# Supplementary material for: Facile synthesis of single-crystalline mesoporous α-Fe2O3 and Fe3O4 nanorods as anode materials for lithium-ion batteries
Source: Royal Society of Chemistry journal article supplement (doi:10.1039/c2jm34083f), 2012-01-01
Supplement: c2jm34083f.pdf [file c2jm34083f.pdf]

# Supporting information

## Facile synthesis of single-crystalline mesoporous $\alpha$ -Fe<sub>2</sub>O<sub>3</sub> and Fe<sub>3</sub>O<sub>4</sub> nanorods as anode materials for lithium-ion batteries

Zhen Xiao<sup>1</sup>, Yang Xia<sup>2</sup>, Zhaohui Ren<sup>1\*</sup>, Zhenya Liu<sup>1</sup>, Gang Xu<sup>1</sup>, Chunying Chao<sup>1</sup>, Xiang Li<sup>1</sup>, Ge Shen<sup>1</sup> and Gaorong Han<sup>1\*</sup>

<sup>1</sup> State key Laboratory of Silicon Materials, Department of Materials Science and Engineering, Cyrus Tang Center for Sensor Materials and Applications, Zhejiang University, Hangzhou 310027, P.R. China. Tel: 86-571-87952341, Fax: 86-571-87952341. E-mail: renzh@zju.edu.cn, hgr@zju.edu.cn

<sup>2</sup> College of Chemical Engineering and Materials Science, Zhejiang University of Technology, Hangzhou, 310014, P. R. China.

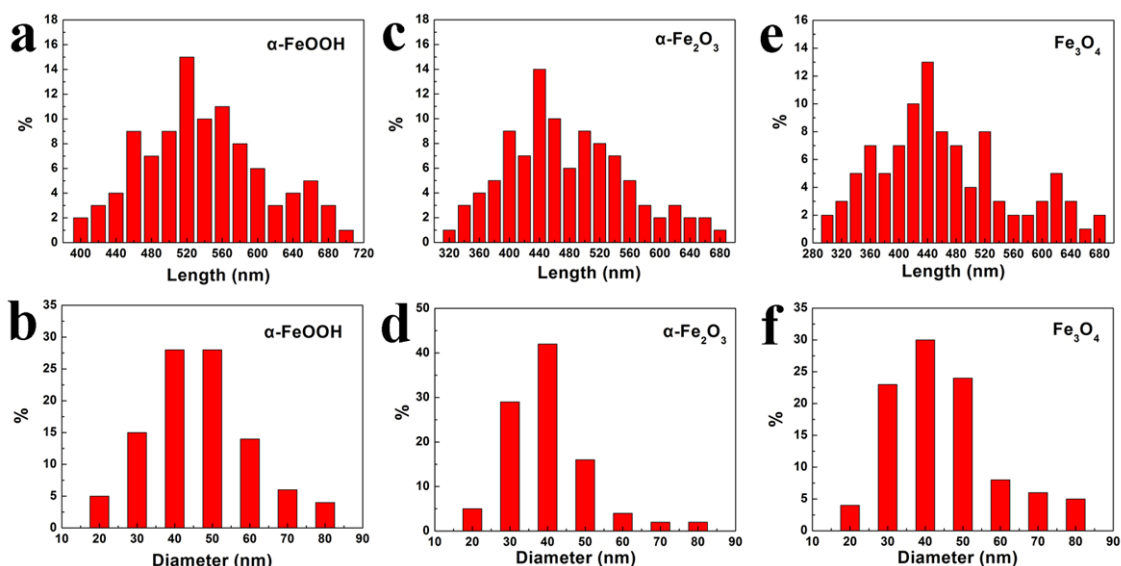

Fig. S1 Particle size distribution histograms of  $\alpha$ -FeOOH,  $\alpha$ -Fe<sub>2</sub>O<sub>3</sub> and Fe<sub>3</sub>O<sub>4</sub> nanorods.

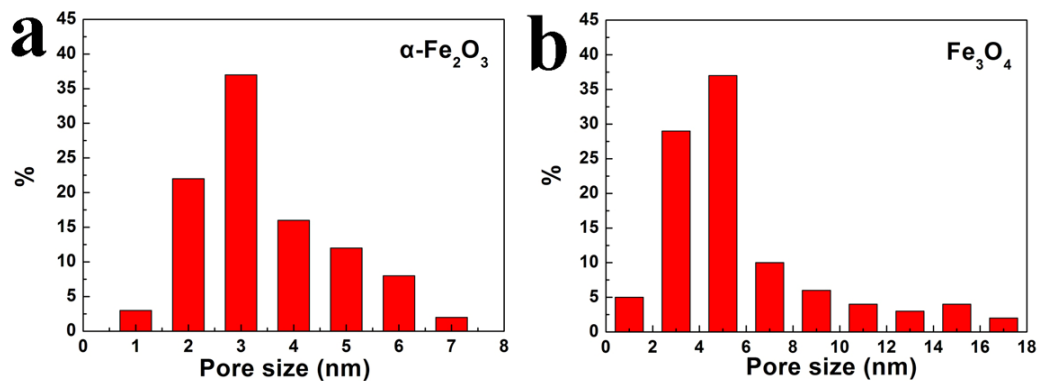

Fig. S2 Pore size distribution histograms of  $\alpha$ -Fe<sub>2</sub>O<sub>3</sub> and Fe<sub>3</sub>O<sub>4</sub> samples.
